# Supplementary material for: Development of the CAT-ANX: A Computerized Adaptive Test for Anxiety
Source: Atypon-hosted journal article supplement (doi:10.1176/appi.ajp.2013.13020178), 2013-08-09
Supplement: 187_ds001.pdf [file 187_ds001.pdf]

 


Psychiatry Online
